# Supplementary material
Source: publisher figshare collection journal article supplement (https://sage.figshare.com/ndownloader/files/20754339)
Supplement: Supplementary file 1 [file 20754339]

## Sheet: Raw GDGT data by Chang et al.
Supplementary Material to "An insight into the Little Ice Age climate in Southern China: a quantitative temperature reconstruction from lacustrine branched GDGTs" by Jie Chang, Enlou Zhang, Luo Wang, Enfeng Liu, Xiaoqiang Yang and James Shulmeister
Age		0	1	2	3	cren	cren'		IIIa	IIIa'	IIIb	IIIb'	IIIc	IIIc'	IIa	IIa'	IIb	IIb'	IIc	IIc'	Ia	Ib	Ic		TEX86	MBT5ME	MBT	CBT5ME	CBT	CBT'	BIT	MBT6ME	CBT6ME	MBT'	Index1	MBT5/6	MBT'	IR6ME	f(IIIa)	f(IIIa')	f(IIIb)	f(IIIb')	f(IIIc)	f(IIIc')	f(IIa)	f(IIa')	f(IIb)	f(IIb')	f(IIc)
Yr (AD)	Depth	1302	1300	1298	1296	1292	1292'		1050	1050‘	1048	1048’	1046	1046‘	1036	1036’	1034	1034‘	1032	1032’	1022	1020	1018
2015	0	377704	9669.3	12176.9	1663.1	8943.2	1530.3		170553	249826	33757.6	41556	11763.5	13222.4	475082	938220	364244	479420	66314.7	51708.1	1.10291e+06	761027	128570		0.61384	0.63981	0.407618	0.146849	0.195357	-0.020071	0.996964	0.529014	0.216293	0.416157	0.464939	0.883141	0.416157	0.612623	0.034891	0.0511082	0.00690597	0.00850133	0.00240652	0.00270497	0.0971899	0.191936	0.0745152	0.0980775	0.0135663
2012	1	929278	24968.8	26055.6	4698.8	19747.6	2422.2		307446	406444	63072.6	66658.1	20831.7	21482.2	880702	1.51128e+06	620315	725895	117476	72197.6	2.18323e+06	1.21643e+06	199724		0.57058	0.64169	0.427826	0.222229	0.251723	-0.0785742	0.99628	0.56211	0.279234	0.436758	0.460271	0.861576	0.436758	0.582483	0.0365434	0.0483104	0.00749687	0.00792305	0.00247608	0.0025534	0.104681	0.179632	0.0737313	0.0862806	0.0139633
1992	9	706932	22362.3	22020.3	4827	14647.2	2079.5		191785	201410	33956.2	31785.2	12680.7	12292.3	583080	825600	335401	394393	63932.6	42459.5	1.26672e+06	692142	113161		0.563995	0.629248	0.4316	0.255325	0.274509	-0.106585	0.995249	0.578783	0.284585	0.439912	0.429259	0.840468	0.439912	0.552607	0.0399485	0.0419535	0.00707303	0.00662081	0.00264137	0.00256047	0.121455	0.171971	0.0698635	0.0821515	0.0133171
1973	17	798364	25363.6	30951.7	4315.2	15131.7	2203.6		174254	204754	26967.5	38388.7	10491.7	15366.6	527298	815165	286340	417710	55107.6	51118.3	1.30261e+06	687513	110735		0.59634	0.660374	0.444738	0.273937	0.278936	-0.104062	0.995021	0.576627	0.282431	0.453494	0.464008	0.870816	0.453494	0.588077	0.0368883	0.043345	0.00570883	0.00812662	0.00222102	0.003253	0.111625	0.172565	0.0606161	0.0884262	0.0116659
1956	25	592985	18287.3	22997.6	4005.2	12570.4	1376.9		130616	167678	23296.6	29773.8	8731.4	11821	384776	633772	254408	347761	52092.5	42343.8	987152	572802	96531.6		0.608132	0.659848	0.44249	0.219716	0.232239	-0.0954398	0.994574	0.573251	0.245709	0.451367	0.470607	0.865536	0.451367	0.590852	0.034891	0.0447912	0.00622312	0.00795335	0.00233238	0.00315769	0.102783	0.169297	0.0679589	0.0928959	0.0139152
1942	33	15446.6	347	501.9	66.8	418.3	57.1		2182.3	1647	431.1	337	153.3	180.2	6156	7810.2	5416.6	4583.4	1053.3	647.3	13056.9	8227.3	1721		0.643298	0.599128	0.429178	0.148654	0.171013	-0.133269	0.986623	0.602068	0.211889	0.438183	0.405544	0.78092	0.438183	0.496936	0.0407123	0.0307259	0.00804248	0.00628697	0.00285992	0.00336176	0.114845	0.145705	0.101051	0.0855066	0.0196501
1931	40	13450.8	327.3	468.2	65.2	478.7	64.2		2011.1	1681.7	394	353.2	141.2	188.1	5957.2	7378.1	4894	4609.8	937.1	682	12935.8	8016.7	1586.2		0.646124	0.611247	0.435394	0.165351	0.175932	-0.135995	0.984275	0.60213	0.20651	0.444641	0.414258	0.786874	0.444641	0.509551	0.0388497	0.0324864	0.00761114	0.00682298	0.00272765	0.00363365	0.115079	0.142527	0.0945405	0.0890504	0.0181025
1901	64	509185	34133.4	24058.9	4289.4	27035.3	4101.5		142088	125326	33392.4	20657.8	11124.9	8563.9	445912	572247	345696	275821	76831.9	33036.6	889350	544809	112341		0.487357	0.594454	0.42519	0.17593	0.213647	-0.129411	0.987722	0.598919	0.25068	0.433988	0.39559	0.789883	0.433988	0.495362	0.0390653	0.0344569	0.0091808	0.00567959	0.00305864	0.00235453	0.122598	0.157332	0.0950446	0.0758333	0.0211239
1892	72	746363	51843.3	38085.9	6265.2	33947.4	4877.5		252729	196640	45816	34111.7	16250.9	16156.2	713919	896862	495983	523350	118772	61398.3	1.52972e+06	941101	179848		0.487065	0.617276	0.440116	0.19347	0.204646	-0.142693	0.990632	0.605288	0.21932	0.448481	0.408435	0.80103	0.448481	0.512611	0.0419631	0.03265	0.00760728	0.0056639	0.0026983	0.00268257	0.118539	0.148915	0.0823528	0.0868969	0.0197208
1874	88	668580	55806.2	37630.2	5329.2	31889.9	5828.5		166274	144028	29167.6	24959.1	13865.3	12557.5	445908	643015	342179	367542	80476.8	43672.8	1.15234e+06	692976	136747		0.46645	0.647747	0.461405	0.188639	0.203529	-0.159598	0.987656	0.615961	0.228632	0.470222	0.454033	0.830477	0.470222	0.534124	0.038707	0.0335284	0.00678994	0.00581024	0.00322771	0.00292327	0.103803	0.149688	0.079656	0.0855604	0.0187342
1863	96	405542	10286.6	9572.1	1926.2	6948.4	900.4		105451	117148	20634	20925	7352.4	8464.4	290020	504885	199048	247406	38307.7	26917.2	710183	401478	67631.3		0.546552	0.640883	0.426376	0.221556	0.249201	-0.0745073	0.995994	0.560224	0.272434	0.435408	0.464212	0.872963	0.435408	0.583493	0.0381262	0.042355	0.00746027	0.00756548	0.00265828	0.00306032	0.104857	0.182542	0.0719663	0.0894504	0.0138502
1857	100	677024	19053.3	18527.7	3486.6	13296.4	1496.6		179466	208434	32479.2	35651.8	11209.3	14428.9	522582	810888	314561	394869	59936.5	44311.3	1.27637e+06	683958	110720		0.552363	0.64897	0.440661	0.255662	0.272541	-0.106862	0.995584	0.578564	0.286624	0.449632	0.456128	0.858734	0.449632	0.573864	0.0381854	0.0443489	0.00691067	0.00758571	0.00238503	0.00307007	0.111191	0.172534	0.0669298	0.0840171	0.0127528
1852	103	646361	20537.8	20697.8	3868.5	12277.7	1878		157404	203242	26846.1	35553.8	9530.6	13670.9	456439	728529	266695	363820	50053.1	43161.6	1147349	613720	100075		0.562859	0.658087	0.441439	0.26046	0.272885	-0.0971618	0.995462	0.572815	0.28307	0.450587	0.460536	0.864672	0.450587	0.589389	0.037334	0.0482063	0.00636754	0.00843289	0.00226053	0.00324256	0.108261	0.172797	0.0632565	0.0862933	0.0118719
1843	108	186074	5482.9	6412.5	1166.2	3969.2	497.1		41616.8	48879.9	6678.2	8140.2	2510.5	3847	116341	194253	69820.6	102240	13065.2	12856.3	327573	172242	28093.2		0.595618	0.678597	0.459787	0.263371	0.267995	-0.122337	0.994582	0.587789	0.279013	0.468427	0.492632	0.883236	0.468427	0.596884	0.0362466	0.0425725	0.00581645	0.0070898	0.00218655	0.00335059	0.101329	0.169187	0.060811	0.0890467	0.0113793
1835	112	757880	23459.3	26568.1	4668.9	15221.7	1928.5		170488	199823	29682.2	40240.5	11527.4	15692	495214	836682	320656	440312	62593.9	54366.1	1.3085e+06	726789	122103		0.585706	0.664313	0.446234	0.236037	0.249137	-0.101132	0.99497	0.576149	0.264356	0.455384	0.48304	0.879016	0.455384	0.59281	0.0352637	0.0413312	0.00613944	0.00832332	0.00238432	0.00324572	0.10243	0.173059	0.0663242	0.0910739	0.0129469
1827	116	823990	25617.5	32860	5368.9	22499.8	2178.1		202942	196354	36670.2	38722.9	13308.6	15953.5	569964	855436	407637	460659	79592.2	56989.1	1391779	842534	147513		0.612	0.645142	0.448044	0.195673	0.216608	-0.128538	0.993053	0.594573	0.236636	0.457042	0.457888	0.843407	0.457042	0.553506	0.0381753	0.0369361	0.00689801	0.00728414	0.00250347	0.003001	0.107216	0.160916	0.0766803	0.0866543	0.014972
1818	120	910285	29856.1	38572.2	6068.7	26158.4	2524.4		223055	214860	41937.8	46609.4	14799.7	19000.3	647040	1.00099e+06	468087	538063	94549	66152.9	1.61323e+06	935112	170060		0.612366	0.646028	0.446111	0.207041	0.225302	-0.121345	0.992978	0.590433	0.249088	0.455252	0.464669	0.851902	0.455252	0.558696	0.0366051	0.0352603	0.00688233	0.00764898	0.00242875	0.0031181	0.106184	0.164271	0.0768168	0.0883005	0.0155162
1810	123	805432	27025.6	32503.7	5062.2	24027.1	2752.7		205727	228282	38063.6	41613.3	13575.8	17473.7	591388	918572	429461	496540	83911.5	59866.2	1.41506e+06	880619	155933		0.598694	0.642837	0.439666	0.185131	0.209263	-0.10654	0.992898	0.581784	0.229049	0.448573	0.453945	0.844577	0.448573	0.564046	0.0368944	0.0409395	0.00682622	0.00746281	0.00243465	0.00313368	0.106058	0.164734	0.0770183	0.089048	0.0150485
1797	128	745110	25254.7	31408	5000.5	24957.5	2643.6		205710	202717	38263.1	39299.6	13061.6	16508.1	597518	863070	430502	465007	84105	56840.6	1.32744e+06	820328	152663		0.607278	0.626891	0.432979	0.187224	0.210821	-0.107478	0.992253	0.583293	0.231529	0.441889	0.432771	0.827929	0.441889	0.545522	0.0387181	0.0381546	0.00720174	0.00739683	0.00245841	0.00310709	0.112463	0.162444	0.0810275	0.0875219	0.0158299
1785	132	740063	27003.5	31923.8	4900.4	28349.5	2875.7		199567	184080	40160.5	38153.3	13907.5	16144.3	599639	859760	448054	471504	88270.5	56014.8	1.34161e+06	848408	159418		0.595171	0.628354	0.437944	0.175321	0.19984	-0.119307	0.991177	0.591039	0.222147	0.446973	0.44037	0.829454	0.446973	0.539144	0.0372001	0.0343133	0.00748608	0.00711193	0.00259242	0.00300936	0.111775	0.160263	0.083519	0.0878903	0.016454
1782	133	618629	22315.2	25740	3917.8	22987.1	2312.8		176378	162295	33911.9	29089.1	11816.4	13651.6	521311	727142	384777	394861	74648.6	47431.8	1.16316e+06	720618	135580		0.588931	0.626701	0.439309	0.182945	0.206142	-0.126222	0.991711	0.595009	0.229069	0.44793	0.434243	0.822609	0.44793	0.533296	0.0383709	0.0353071	0.00737749	0.0063283	0.00257064	0.00296989	0.113411	0.158189	0.0837078	0.0859015	0.0162397
1766	138	526027	22919	24971.6	3945	18850.4	2371.1		165089	145962	33256	34010.4	14963.5	18252.7	509782	711290	371613	406572	76412.7	52461.1	1.16379e+06	694585	140446		0.577192	0.630556	0.440416	0.195807	0.209329	-0.122087	0.993056	0.593586	0.231171	0.450388	0.439701	0.829369	0.450388	0.538869	0.0363754	0.0321608	0.00732755	0.00749377	0.00329702	0.00402176	0.112324	0.156724	0.0818804	0.0895831	0.0168366
1759	140	695084	30605.5	33133.1	4858	24250.5	3619.4		235478	205295	49102.3	36400.5	21769.9	21904.9	695588	973966	537657	518374	114182	70249.7	1.58451e+06	925592	194100		0.576195	0.620518	0.437278	0.192636	0.215405	-0.126626	0.993479	0.596902	0.248424	0.446607	0.429459	0.818753	0.446607	0.524772	0.0380775	0.0331969	0.00794	0.00588608	0.00352026	0.00354209	0.112479	0.157493	0.0869408	0.0838228	0.0184635
1744	144	647036	35460.3	32022.1	4600.3	28183.7	4397.6		227455	161921	53803.9	31992.2	22038	15009.2	654804	904147	574856	412994	127282	52171.6	1.3958e+06	839316	198215		0.536347	0.594427	0.429022	0.161379	0.208743	-0.136648	0.991643	0.606579	0.264006	0.43852	0.407375	0.798506	0.43852	0.487339	0.0401028	0.0285484	0.00948621	0.00564057	0.00388554	0.00264628	0.115449	0.159411	0.101353	0.0728152	0.0224413
1728	148	413487	23624.4	18174.3	2716.8	18466	2706.5		141462	102186	30861.7	16692.5	11100.3	7840.7	398312	527533	331214	252677	73160.5	30485.3	865783	508398	115050		0.499716	0.601626	0.436372	0.177701	0.21491	-0.150755	0.991009	0.613699	0.262622	0.445043	0.406953	0.79539	0.445043	0.487342	0.0414508	0.0299423	0.00904304	0.00489121	0.00325259	0.00229747	0.116713	0.154577	0.0970519	0.0740391	0.0214374
1712	152	364435	22042.6	17007.1	3052	17465.9	3332.5		134223	106453	25527.5	17513.4	10549.8	8195.8	362313	487505	280739	259009	65951.8	29773.5	819713	518762	103348		0.514846	0.621174	0.446443	0.169808	0.197899	-0.153818	0.990939	0.613471	0.225496	0.455151	0.420951	0.806743	0.455151	0.508151	0.0415605	0.0329619	0.00790429	0.00542282	0.00326662	0.00253773	0.112186	0.15095	0.0869274	0.0801991	0.0204212
1694	156	513243	30716.9	24600.9	3904.7	19992	2970.7		193324	143499	31850.2	29565.4	11931.7	13520.7	506106	678267	360624	400190	84801.6	50035.1	1.18899e+06	666022	140993		0.506105	0.626759	0.443584	0.217773	0.22099	-0.136979	0.992677	0.602825	0.24336	0.452316	0.421039	0.814244	0.452316	0.52525	0.0429637	0.0318907	0.00707827	0.0065705	0.00265165	0.00300479	0.112475	0.150735	0.0801437	0.0889368	0.018846
1676	160	562507	35175.8	26433.3	4060.1	21806.1	3583		210725	157174	34704.3	30591.7	14179.4	15043.4	550302	764422	387398	439226	87438	54881.2	1351942	716145	155778		0.492062	0.63383	0.447462	0.236477	0.237668	-0.138367	0.992865	0.603458	0.262869	0.456137	0.432696	0.826201	0.456137	0.532153	0.0423999	0.031625	0.00698283	0.00615533	0.00285303	0.00302687	0.110726	0.153809	0.0779481	0.0883763	0.0175933
1657	164	516203	36374.9	24757.4	3654.1	21554.4	3268		195277	140679	28571.9	24283	13283.5	12436.3	485500	663394	346885	391866	78779.1	50395	1.26715e+06	705168	145513		0.465503	0.648422	0.465541	0.221657	0.223562	-0.17099	0.992229	0.622729	0.245459	0.473723	0.446238	0.826527	0.473723	0.527712	0.0429258	0.0309241	0.00628067	0.00533789	0.00291998	0.00273375	0.106723	0.145827	0.0762522	0.0861399	0.0173172
1638	168	361734	33583	19785.7	2895	17862.6	3115.7		145131	88124.1	21287.3	16886.3	9078.7	8292.8	351096	458837	250366	259762	59016.7	31949.7	877699	505973	104415		0.434433	0.640296	0.46679	0.210763	0.220341	-0.186633	0.990787	0.632706	0.241902	0.475068	0.4348	0.81741	0.475068	0.5082	0.0455253	0.0276432	0.0066775	0.00529697	0.00284785	0.00260132	0.110133	0.14393	0.0785359	0.0814833	0.0185126
1618	172	624154	49679.3	28960.8	4017.2	20057.5	3557.5		220371	111114	27869	24827.3	12442.1	12468.2	491663	602556	338640	358048	80419.4	42853.5	1.17727e+06	608363	135175		0.423773	0.621175	0.452585	0.246087	0.240683	-0.173891	0.992353	0.625125	0.265215	0.461015	0.404186	0.797771	0.461015	0.495795	0.0519243	0.0261809	0.00656657	0.00584987	0.00293164	0.00293779	0.115847	0.141976	0.0797912	0.0843641	0.0189486
1598	176	726759	48652.8	31401.1	4507.5	20668	3326.5		213401	118727	28999.3	22361	10884.6	8892.4	535196	651840	348721	352333	79112.3	37836	1.21268e+06	600900	152164		0.446422	0.617759	0.449411	0.26496	0.265564	-0.165078	0.992491	0.622518	0.291368	0.456841	0.396325	0.802718	0.456841	0.49495	0.048788	0.0271435	0.00662985	0.0051122	0.00248845	0.00203299	0.122357	0.149024	0.079725	0.0805508	0.0180867
1577	180	884263	59190.8	43403.3	5503.2	27142.8	3373.4		197252	136029	26461.4	25093.3	11634.2	9967.4	599066	678915	357320	384602	80347.4	42318.4	1.35897e+06	729703	170968		0.469001	0.639813	0.469913	0.255583	0.253306	-0.193304	0.990944	0.638937	0.262177	0.477172	0.414559	0.809597	0.477172	0.50095	0.0410203	0.0282883	0.00550287	0.00521837	0.00241943	0.00207281	0.124581	0.141186	0.0743076	0.0799813	0.0167089
1557	184	604717	49773.4	29064.4	4240.4	20376.1	3744		143504	102725	19470.6	17837.3	7302.1	8310.4	416492	530468	246993	291210	50624.8	32584.1	972678	520127	129279		0.42672	0.647158	0.464833	0.257892	0.258598	-0.163807	0.99068	0.622629	0.2678	0.471991	0.427566	0.833539	0.471991	0.526438	0.0411234	0.0294374	0.0055796	0.00511155	0.00209253	0.00238147	0.119352	0.152014	0.0707797	0.0834508	0.0145073
1536	188	1.00261e+06	84527.2	36029.6	7365.4	57243	8785.5		235024	151873	28043.1	34769.5	13074.8	16470.4	774132	932823	445630	509967	93608.8	61450.5	1.86953e+06	1.0086e+06	262994		0.381694	0.663996	0.487905	0.259573	0.260272	-0.202543	0.985763	0.647858	0.266089	0.495006	0.444745	0.841483	0.495006	0.517872	0.0365057	0.0235901	0.00435587	0.00540067	0.00203088	0.00255831	0.120244	0.144893	0.0692187	0.0792121	0.0145401
1515	192	2.03738e+06	165049	57746.2	10091.8	103991	13311.4		291288	189533	38800.2	33071.6	16914.6	14744.4	943644	1.2584e+06	733697	644462	189343	62489.3	2.272e+06	1.35691e+06	531373		0.329609	0.652699	0.48507	0.186996	0.213732	-0.182314	0.979444	0.653826	0.246496	0.490997	0.417362	0.832646	0.490997	0.498756	0.0339628	0.0220986	0.00452392	0.00385599	0.00197216	0.00171913	0.110024	0.146723	0.0855456	0.0751413	0.0220765
1495	196	1.91004e+06	147016	77470.1	11213.8	106937	16110.2		319023	231304	40834.3	36933	14784.3	13481	1083153	1.11806e+06	532544	580568	106166	57744.3	2.3199e+06	1.28836e+06	356764		0.416163	0.654129	0.489532	0.271582	0.274767	-0.218967	0.979349	0.660495	0.264708	0.496026	0.403976	0.81496	0.496026	0.492935	0.0393875	0.0285574	0.00504151	0.00455985	0.00182531	0.0016644	0.133729	0.138038	0.0657494	0.0716785	0.0131076
1474	200	1243276	75074.9	29475.4	5400.8	68761.2	13409.8		232295	160058	31267.9	22666.6	11479.5	9200.5	826772	768753	416703	361273	64625.7	36279.8	1.80781e+06	944646	289068		0.391421	0.657674	0.50837	0.286742	0.295715	-0.266319	0.982207	0.691294	0.295125	0.51479	0.402149	0.803521	0.51479	0.461768	0.0388264	0.0267526	0.00522621	0.00378857	0.00191872	0.0015378	0.138189	0.128492	0.069649	0.0603843	0.0108017
1452	204	856226	51502.3	19904.7	4416.9	55784	10761.6		156493	107007	22882.8	15695.5	8197.5	7101.5	553787	549853	314833	266026	44003.5	26931.1	1.16125e+06	783857	255182		0.405186	0.666656	0.514916	0.193398	0.220005	-0.253353	0.978413	0.693462	0.212135	0.521491	0.408085	0.814516	0.521491	0.469225	0.0366229	0.0250421	0.00535508	0.00367309	0.0019184	0.00166191	0.129598	0.128678	0.0736779	0.062256	0.0102978
1431	208	699372	44284.8	15162.6	2911.9	43809.3	9476.2		121365	82968.6	18134.1	12014.4	7238.6	5504.9	429289	460681	266319	220556	36911.7	21690.4	948620	679454	222778		0.383525	0.677941	0.523798	0.163434	0.197664	-0.256143	0.979006	0.697312	0.194756	0.530234	0.428212	0.829188	0.530234	0.477464	0.0343468	0.0234804	0.00513202	0.00340012	0.00204855	0.00155791	0.12149	0.130374	0.0753691	0.0624181	0.0104461
1409	212	690022	51335.9	19846.9	4711.8	58661	11217.9		104440	86058.7	19225.5	14355.9	6532	4987.5	378368	407122	217272	214527	34353.8	22116	883224	572967	170143		0.410694	0.681465	0.518652	0.20316	0.220317	-0.247748	0.969414	0.684628	0.214459	0.526221	0.437853	0.831058	0.526221	0.496348	0.0333069	0.0274449	0.00613118	0.00457822	0.00208311	0.00159056	0.120665	0.129835	0.06929	0.0684146	0.0109557
1387	216	656702	52411.4	21953.4	4626.2	69580.8	13746.5		90281.1	70666.8	15569.6	10776.2	4972.9	4098.3	333180	348258	165886	189408	29370.4	18867.3	760712	394710	113894		0.434841	0.665059	0.497644	0.290324	0.283947	-0.225066	0.958402	0.66408	0.27842	0.504651	0.423028	0.82584	0.504651	0.501098	0.0353953	0.0277054	0.00610417	0.00422488	0.00194966	0.00160677	0.130625	0.136537	0.0650369	0.0742586	0.0115149
1364	220	793938	66214.4	26768.3	5553.4	80734.6	15192.4		113256	99263.6	20127.5	12979.4	6564.3	5589.3	415261	443558	211180	230891	36383.3	23855.6	982225	557006	142853		0.417785	0.676934	0.509569	0.259881	0.265465	-0.244033	0.962173	0.673313	0.257584	0.516653	0.440429	0.831164	0.516653	0.504128	0.0343097	0.0300708	0.00609741	0.00393197	0.00198858	0.00169322	0.125799	0.134371	0.0639747	0.0699459	0.0110219
1341	224	659545	54632.9	24416.8	4885.2	75485	15360.3		92723.4	73267.3	16262.8	12347.9	3887.3	4469.8	345971	345026	182583	183032	31500	18948.3	784286	439864	121199		0.449793	0.666583	0.506653	0.259075	0.262821	-0.249	0.956031	0.678633	0.258399	0.513806	0.423811	0.816057	0.513806	0.486322	0.0349192	0.0275921	0.0061245	0.00465017	0.00146394	0.00168331	0.130291	0.129935	0.06876	0.068929	0.0118628
1318	228	753242	63015.2	32696.1	5988.8	75842.2	18589.3		98186.1	71186.1	23382.9	11836.4	6152.2	4348.2	358316	362372	199433	222320	35622	23879.4	793343	475657	146640		0.476137	0.662526	0.499754	0.231962	0.227144	-0.225341	0.956889	0.670417	0.21901	0.507952	0.415756	0.816207	0.507952	0.491126	0.034662	0.0251304	0.00825471	0.00417853	0.00217187	0.00153502	0.126494	0.127926	0.0704045	0.0784841	0.0125754
1295	232	694547	40566.9	18228.2	4556.6	75205.6	18396.1		88961.6	71102.6	20349.8	12371.3	6452.9	3713.6	350415	339242	198707	191292	34337.3	19584.3	712594	443222	118925		0.503755	0.645777	0.488169	0.21905	0.226066	-0.226768	0.954074	0.66669	0.219507	0.496321	0.404623	0.799689	0.496321	0.476836	0.0340683	0.0272291	0.00779306	0.00473765	0.00247117	0.00142214	0.134193	0.129915	0.0760959	0.0732562	0.0131496
1271	236	532672	31933.8	14027.5	3788.6	74874.9	17536.3		97127.6	82959.3	22420.8	14563.5	5721.7	3285	374542	396598	202243	202419	36992.5	19204.5	786977	458486	103347		0.525403	0.646026	0.480536	0.245003	0.256514	-0.21488	0.958703	0.65228	0.253056	0.488541	0.420098	0.814593	0.488541	0.493135	0.0346033	0.0295556	0.00798778	0.00518849	0.00203845	0.00117034	0.133437	0.141294	0.0720525	0.0721152	0.0131792
1248	240	395269	23425.6	7991.4	2399.2	44717.4	10837.1		82416.9	77108.6	19565.2	9609.9	4862.9	2825.1	307698	345586	164395	159036	32087.9	15313.7	606668	353167	73986.6		0.475389	0.628522	0.458595	0.247158	0.270023	-0.179729	0.969459	0.629113	0.269311	0.466218	0.404935	0.812598	0.466218	0.499367	0.0365594	0.0342047	0.00867895	0.00426287	0.00215714	0.00125319	0.136492	0.153299	0.0729241	0.070547	0.0142339
1224	244	329325	16204.2	5785.9	2193.3	49572.9	12487.3		81118.3	66632.1	16708.3	8239.2	3881.1	1970.2	316905	316937	153639	139784	28732.3	10179.2	647901	333819	74391.8		0.558116	0.637327	0.479868	0.296502	0.310365	-0.232627	0.966484	0.66013	0.30904	0.486679	0.404086	0.806187	0.486679	0.474997	0.0368579	0.0302758	0.00759179	0.00374367	0.00176346	0.000895205	0.143993	0.144007	0.0698095	0.063514	0.0130552
1200	248	404930	20348.5	9686.6	2843.9	61971	15999.8		81573.5	77324.6	21780.3	12086.3	3853.8	3810.3	300641	343847	164031	181378	26341.6	16109.8	627133	363011	82923.9		0.583695	0.64206	0.465369	0.245597	0.254066	-0.174817	0.958478	0.628398	0.2513	0.473904	0.419457	0.822363	0.473904	0.514737	0.0353768	0.0335342	0.00944569	0.00524159	0.00167132	0.00165245	0.130382	0.14912	0.0711371	0.0786603	0.0114238
1176	252	208900	6852.7	2281.9	2214.2	78709.8	21906.6		58750.9	37092.5	9808.3	6006.8	1902.9	1235.9	195491	249608	107722	95168.1	17123.6	6503.9	458744	247432	67406.7		0.793937	0.664372	0.495887	0.265317	0.30257	-0.222904	0.927012	0.661635	0.315462	0.501986	0.450391	0.859996	0.501986	0.503063	0.0376609	0.0237773	0.00628739	0.00385052	0.00121981	0.000792246	0.125315	0.160006	0.0690527	0.0610053	0.0109767
1152	256	332474	24324.4	9690.6	5071.7	125295	32748.5		107928	124271	21411.8	13671.1	4287.3	2760.5	412041	573611	192183	231173	29119.9	14775.5	1.01228e+06	585103	104814		0.661386	0.689381	0.49635	0.263027	0.296922	-0.203629	0.946806	0.639333	0.288436	0.502523	0.489149	0.886308	0.502523	0.555954	0.0314711	0.0362365	0.00624354	0.0039864	0.00125015	0.000804944	0.120149	0.167261	0.0560394	0.0674086	0.00849118
1140	258	99560.5	6909.8	2660.8	1736.6	34322.7	8993.6		44690.5	48030	7743	4346.8	2007.2	953.1	174799	235052	84079.2	91947.1	13075.7	6441.7	396662	233544	44707.7		0.659629	0.674032	0.486222	0.255074	0.294282	-0.19429	0.963234	0.635701	0.287981	0.491551	0.469076	0.875313	0.491551	0.542329	0.0321959	0.0346018	0.00557821	0.00313152	0.00144603	0.000686632	0.125929	0.169336	0.0605723	0.0662405	0.00942
[truncated: 17 more columns]
